# Supplementary material
Source: publisher figshare collection journal article supplement (https://acs.figshare.com/ndownloader/files/5369729)
Supplement: Supplementary file 1 [file 5369729]

 
data_baran402 
  
_audit_creation_method            SHELXL-97 
_chemical_name_systematic 
; 
 ? 
; 
_chemical_name_common             ? 
_chemical_melting_point           ? 
_chemical_formula_moiety          'C15 H20 O3' 
_chemical_formula_sum 
 'C15 H20 O3' 
_chemical_formula_weight          248.31 
  
loop_ 
 _atom_type_symbol 
 _atom_type_description 
 _atom_type_scat_dispersion_real 
 _atom_type_scat_dispersion_imag 
 _atom_type_scat_source 
 'C'  'C'   0.0033   0.0016 
 'International Tables Vol C Tables 4.2.6.8 and 6.1.1.4' 
 'H'  'H'   0.0000   0.0000 
 'International Tables Vol C Tables 4.2.6.8 and 6.1.1.4' 
 'O'  'O'   0.0106   0.0060 
 'International Tables Vol C Tables 4.2.6.8 and 6.1.1.4' 
  
_symmetry_cell_setting            Monoclinic 
_symmetry_space_group_name_H-M    P2(1)/c 
  
loop_ 
 _symmetry_equiv_pos_as_xyz 
 'x, y, z' 
 '-x, y+1/2, -z+1/2' 
 '-x, -y, -z' 
 'x, -y-1/2, z-1/2' 
  
_cell_length_a                    14.421(5) 
_cell_length_b                    7.5148(18) 
_cell_length_c                    12.931(4) 
_cell_angle_alpha                 90.00 
_cell_angle_beta                  103.204(10) 
_cell_angle_gamma                 90.00 
_cell_volume                      1364.3(7) 
_cell_formula_units_Z             4 
_cell_measurement_temperature     100(2) 
_cell_measurement_reflns_used     4325 
_cell_measurement_theta_min       2.90 
_cell_measurement_theta_max       26.39 
  
_exptl_crystal_description        BLOCK 
_exptl_crystal_colour             colourless 
_exptl_crystal_size_max           0.28 
_exptl_crystal_size_mid           0.15 
_exptl_crystal_size_min           0.12 
_exptl_crystal_density_meas       ? 
_exptl_crystal_density_diffrn     1.209 
_exptl_crystal_density_method     'not measured' 
_exptl_crystal_F_000              536 
_exptl_absorpt_coefficient_mu     0.083 
_exptl_absorpt_correction_type    multi-scan 
_exptl_absorpt_correction_T_min   0.9772 
_exptl_absorpt_correction_T_max   0.9901 
_exptl_absorpt_process_details    sadabs 
  
_exptl_special_details 
; 
 ? 
; 
  
_diffrn_ambient_temperature       100(2) 
_diffrn_radiation_wavelength      0.71073 
_diffrn_radiation_type            MoK\a 
_diffrn_radiation_source          'fine-focus sealed tube' 
_diffrn_radiation_monochromator   graphite 
_diffrn_measurement_device_type   'Bruker APEX-I CCD' 
_diffrn_measurement_method        '\f and \w scans' 
_diffrn_detector_area_resol_mean  ? 
_diffrn_reflns_number             14757 
_diffrn_reflns_av_R_equivalents   0.0472 
_diffrn_reflns_av_sigmaI/netI     0.0390 
_diffrn_reflns_limit_h_min        -18 
_diffrn_reflns_limit_h_max        16 
_diffrn_reflns_limit_k_min        -9 
_diffrn_reflns_limit_k_max        9 
_diffrn_reflns_limit_l_min        -16 
_diffrn_reflns_limit_l_max        16 
_diffrn_reflns_theta_min          2.90 
_diffrn_reflns_theta_max          26.52 
_reflns_number_total              2828 
_reflns_number_gt                 2170 
_reflns_threshold_expression      >2sigma(I) 
  
_computing_data_collection        'Bruker APEX2' 
_computing_cell_refinement        'Bruker SAINT' 
_computing_data_reduction         'Bruker SAINT' 
_computing_structure_solution     'SHELXS-97 (Sheldrick, 2008)' 
_computing_structure_refinement   'SHELXL-97 (Sheldrick, 2008)' 
_computing_molecular_graphics     'Bruker SHELXTL' 
_computing_publication_material   'Bruker SHELXTL' 
  
_refine_special_details 
; 
 Refinement of F^2^ against ALL reflections.  The weighted R-factor wR and 
 goodness of fit S are based on F^2^, conventional R-factors R are based 
 on F, with F set to zero for negative F^2^. The threshold expression of 
 F^2^ > 2sigma(F^2^) is used only for calculating R-factors(gt) etc. and is 
 not relevant to the choice of reflections for refinement.  R-factors based 
 on F^2^ are statistically about twice as large as those based on F, and R- 
 factors based on ALL data will be even larger. 
; 
  
_refine_ls_structure_factor_coef  Fsqd 
_refine_ls_matrix_type            full 
_refine_ls_weighting_scheme       calc 
_refine_ls_weighting_details 
 'calc w=1/[\s^2^(Fo^2^)+(0.0504P)^2^+0.3776P] where P=(Fo^2^+2Fc^2^)/3' 
_atom_sites_solution_primary      direct 
_atom_sites_solution_secondary    difmap 
_atom_sites_solution_hydrogens    geom 
_refine_ls_hydrogen_treatment     mixed 
_refine_ls_extinction_method      none 
_refine_ls_extinction_coef        ? 
_refine_ls_number_reflns          2828 
_refine_ls_number_parameters      169 
_refine_ls_number_restraints      7 
_refine_ls_R_factor_all           0.0601 
_refine_ls_R_factor_gt            0.0413 
_refine_ls_wR_factor_ref          0.1071 
_refine_ls_wR_factor_gt           0.0975 
_refine_ls_goodness_of_fit_ref    1.026 
_refine_ls_restrained_S_all       1.030 
_refine_ls_shift/su_max           0.000 
_refine_ls_shift/su_mean          0.000 
  
loop_ 
 _atom_site_label 
 _atom_site_type_symbol 
 _atom_site_fract_x 
 _atom_site_fract_y 
 _atom_site_fract_z 
 _atom_site_U_iso_or_equiv 
 _atom_site_adp_type 
 _atom_site_occupancy 
 _atom_site_symmetry_multiplicity 
 _atom_site_calc_flag 
 _atom_site_refinement_flags 
 _atom_site_disorder_assembly 
 _atom_site_disorder_group 
O1 O 0.52858(8) 0.77573(15) 0.50011(9) 0.0313(3) Uani 1 1 d . . . 
O2 O 0.27260(8) 0.95471(13) 0.28351(8) 0.0218(3) Uani 1 1 d D . . 
H2 H 0.2493(11) 0.909(2) 0.3324(10) 0.026 Uiso 1 1 d D . . 
O3 O 0.20843(7) 0.69850(14) -0.04564(7) 0.0217(3) Uani 1 1 d . . . 
C1 C 0.46687(10) 0.7906(2) 0.41871(12) 0.0224(3) Uani 1 1 d . . . 
H1A H 0.4579 0.9029 0.3841 0.027 Uiso 1 1 calc R . . 
C2 C 0.40615(10) 0.64208(19) 0.37240(11) 0.0190(3) Uani 1 1 d . . . 
H2A H 0.4203 0.5288 0.4047 0.023 Uiso 1 1 calc R . . 
C3 C 0.33196(10) 0.65170(19) 0.28799(11) 0.0163(3) Uani 1 1 d . . . 
C4 C 0.29852(10) 0.81682(18) 0.21937(11) 0.0169(3) Uani 1 1 d . . . 
C5 C 0.20702(10) 0.74733(19) 0.13703(11) 0.0171(3) Uani 1 1 d . . . 
C6 C 0.16934(10) 0.60459(19) 0.20393(11) 0.0177(3) Uani 1 1 d . . . 
H6A H 0.1475 0.6677 0.2622 0.021 Uiso 1 1 calc R . . 
C7 C 0.26129(10) 0.49991(19) 0.25540(11) 0.0175(3) Uani 1 1 d . . . 
C8 C 0.29153(12) 0.38442(19) 0.17024(12) 0.0225(3) Uani 1 1 d . . . 
H8A H 0.3529 0.3257 0.2021 0.027 Uiso 1 1 calc R . . 
H8B H 0.2433 0.2901 0.1471 0.027 Uiso 1 1 calc R . . 
C9 C 0.30254(12) 0.4917(2) 0.07288(12) 0.0236(4) Uani 1 1 d . . . 
H9A H 0.3691 0.5342 0.0850 0.028 Uiso 1 1 calc R . . 
H9B H 0.2911 0.4114 0.0106 0.028 Uiso 1 1 calc R . . 
C10 C 0.23681(10) 0.65013(19) 0.04664(11) 0.0170(3) Uani 1 1 d . . . 
C11 C 0.37112(11) 0.9021(2) 0.16501(11) 0.0216(3) Uani 1 1 d . . . 
H11A H 0.4195 0.9650 0.2180 0.032 Uiso 1 1 calc R . . 
H11B H 0.3387 0.9867 0.1110 0.032 Uiso 1 1 calc R . . 
H11C H 0.4018 0.8095 0.1311 0.032 Uiso 1 1 calc R . . 
C12 C 0.13545(11) 0.8942(2) 0.09519(11) 0.0229(3) Uani 1 1 d . . . 
H12A H 0.0805 0.8436 0.0448 0.034 Uiso 1 1 calc R . . 
H12B H 0.1656 0.9848 0.0592 0.034 Uiso 1 1 calc R . . 
H12C H 0.1142 0.9489 0.1546 0.034 Uiso 1 1 calc R . . 
C13 C 0.08741(11) 0.4956(2) 0.14392(12) 0.0262(4) Uani 1 1 d . . . 
H13A H 0.0949 0.4338 0.0823 0.031 Uiso 1 1 calc R . . 
C14 C 0.00606(13) 0.4813(3) 0.17196(15) 0.0496(6) Uani 1 1 d U . . 
H14A H -0.0034 0.5418 0.2332 0.060 Uiso 1 1 calc R . . 
H14B H -0.0435 0.4104 0.1310 0.060 Uiso 1 1 calc R . . 
C15 C 0.24810(11) 0.38302(19) 0.34743(11) 0.0221(3) Uani 1 1 d . . . 
H15A H 0.3072 0.3179 0.3764 0.033 Uiso 1 1 calc R . . 
H15B H 0.1963 0.2982 0.3219 0.033 Uiso 1 1 calc R . . 
H15C H 0.2323 0.4579 0.4031 0.033 Uiso 1 1 calc R . . 
  
loop_ 
 _atom_site_aniso_label 
 _atom_site_aniso_U_11 
 _atom_site_aniso_U_22 
 _atom_site_aniso_U_33 
 _atom_site_aniso_U_23 
 _atom_site_aniso_U_13 
 _atom_site_aniso_U_12 
O1 0.0257(6) 0.0350(7) 0.0280(6) 0.0032(5) -0.0047(5) -0.0063(5) 
O2 0.0343(6) 0.0164(5) 0.0168(5) -0.0020(4) 0.0100(5) 0.0008(5) 
O3 0.0244(6) 0.0283(6) 0.0132(5) 0.0000(4) 0.0059(4) -0.0040(5) 
C1 0.0212(8) 0.0244(8) 0.0216(7) 0.0013(6) 0.0047(6) -0.0019(6) 
C2 0.0192(7) 0.0190(7) 0.0197(7) 0.0023(6) 0.0060(6) 0.0013(6) 
C3 0.0180(7) 0.0173(7) 0.0158(7) -0.0012(6) 0.0083(5) 0.0005(6) 
C4 0.0212(7) 0.0164(7) 0.0139(6) -0.0024(5) 0.0059(6) 0.0001(6) 
C5 0.0177(7) 0.0198(8) 0.0144(7) 0.0000(6) 0.0053(6) 0.0007(6) 
C6 0.0188(7) 0.0218(8) 0.0135(6) -0.0010(6) 0.0057(5) -0.0018(6) 
C7 0.0211(7) 0.0167(7) 0.0149(7) -0.0007(6) 0.0044(6) -0.0013(6) 
C8 0.0294(8) 0.0167(7) 0.0221(7) -0.0034(6) 0.0075(6) 0.0003(6) 
C9 0.0318(9) 0.0222(8) 0.0194(7) -0.0045(6) 0.0111(6) 0.0038(7) 
C10 0.0172(7) 0.0197(7) 0.0155(7) -0.0019(6) 0.0064(6) -0.0056(6) 
C11 0.0251(8) 0.0214(8) 0.0193(7) 0.0006(6) 0.0067(6) -0.0030(6) 
C12 0.0236(8) 0.0278(8) 0.0188(7) 0.0027(6) 0.0076(6) 0.0063(6) 
C13 0.0268(9) 0.0326(9) 0.0179(7) 0.0017(6) 0.0024(6) -0.0077(7) 
C14 0.0328(11) 0.0856(16) 0.0298(9) -0.0028(10) 0.0060(8) -0.0281(10) 
C15 0.0275(8) 0.0189(8) 0.0196(7) 0.0022(6) 0.0048(6) -0.0042(6) 
  
_geom_special_details 
; 
 All esds (except the esd in the dihedral angle between two l.s. planes) 
 are estimated using the full covariance matrix.  The cell esds are taken 
 into account individually in the estimation of esds in distances, angles 
 and torsion angles; correlations between esds in cell parameters are only 
 used when they are defined by crystal symmetry.  An approximate (isotropic) 
 treatment of cell esds is used for estimating esds involving l.s. planes. 
; 
  
loop_ 
 _geom_bond_atom_site_label_1 
 _geom_bond_atom_site_label_2 
 _geom_bond_distance 
 _geom_bond_site_symmetry_2 
 _geom_bond_publ_flag 
O1 C1 1.2184(18) . ? 
O2 C4 1.4294(17) . ? 
O2 H2 0.853(9) . ? 
O3 C10 1.2250(17) . ? 
C1 C2 1.460(2) . ? 
C1 H1A 0.9500 . ? 
C2 C3 1.345(2) . ? 
C2 H2A 0.9500 . ? 
C3 C7 1.524(2) . ? 
C3 C4 1.5375(19) . ? 
C4 C11 1.529(2) . ? 
C4 C5 1.5829(19) . ? 
C5 C10 1.5210(19) . ? 
C5 C12 1.524(2) . ? 
C5 C6 1.552(2) . ? 
C6 C13 1.500(2) . ? 
C6 C7 1.555(2) . ? 
C6 H6A 1.0000 . ? 
C7 C15 1.526(2) . ? 
C7 C8 1.541(2) . ? 
C8 C9 1.534(2) . ? 
C8 H8A 0.9900 . ? 
C8 H8B 0.9900 . ? 
C9 C10 1.511(2) . ? 
C9 H9A 0.9900 . ? 
C9 H9B 0.9900 . ? 
C11 H11A 0.9800 . ? 
C11 H11B 0.9800 . ? 
C11 H11C 0.9800 . ? 
C12 H12A 0.9800 . ? 
C12 H12B 0.9800 . ? 
C12 H12C 0.9800 . ? 
C13 C14 1.309(2) . ? 
C13 H13A 0.9500 . ? 
C14 H14A 0.9500 . ? 
C14 H14B 0.9500 . ? 
C15 H15A 0.9800 . ? 
C15 H15B 0.9800 . ? 
C15 H15C 0.9800 . ? 
  
loop_ 
 _geom_angle_atom_site_label_1 
 _geom_angle_atom_site_label_2 
 _geom_angle_atom_site_label_3 
 _geom_angle 
 _geom_angle_site_symmetry_1 
 _geom_angle_site_symmetry_3 
 _geom_angle_publ_flag 
C4 O2 H2 109.8(11) . . ? 
O1 C1 C2 122.40(14) . . ? 
O1 C1 H1A 118.8 . . ? 
C2 C1 H1A 118.8 . . ? 
C3 C2 C1 125.69(14) . . ? 
C3 C2 H2A 117.2 . . ? 
C1 C2 H2A 117.2 . . ? 
C2 C3 C7 122.84(13) . . ? 
C2 C3 C4 126.76(13) . . ? 
C7 C3 C4 110.04(11) . . ? 
O2 C4 C11 105.07(11) . . ? 
O2 C4 C3 109.84(11) . . ? 
C11 C4 C3 116.51(12) . . ? 
O2 C4 C5 109.94(11) . . ? 
C11 C4 C5 112.47(11) . . ? 
C3 C4 C5 103.02(11) . . ? 
C10 C5 C12 111.25(11) . . ? 
C10 C5 C6 107.02(11) . . ? 
C12 C5 C6 113.80(12) . . ? 
C10 C5 C4 109.69(11) . . ? 
C12 C5 C4 113.13(12) . . ? 
C6 C5 C4 101.38(10) . . ? 
C13 C6 C5 115.06(11) . . ? 
C13 C6 C7 116.06(12) . . ? 
C5 C6 C7 102.43(11) . . ? 
C13 C6 H6A 107.6 . . ? 
C5 C6 H6A 107.6 . . ? 
C7 C6 H6A 107.6 . . ? 
C3 C7 C15 114.21(11) . . ? 
C3 C7 C8 109.80(12) . . ? 
C15 C7 C8 109.83(12) . . ? 
C3 C7 C6 101.00(11) . . ? 
C15 C7 C6 112.28(12) . . ? 
C8 C7 C6 109.39(11) . . ? 
C9 C8 C7 112.93(12) . . ? 
C9 C8 H8A 109.0 . . ? 
C7 C8 H8A 109.0 . . ? 
C9 C8 H8B 109.0 . . ? 
C7 C8 H8B 109.0 . . ? 
H8A C8 H8B 107.8 . . ? 
C10 C9 C8 114.92(13) . . ? 
C10 C9 H9A 108.5 . . ? 
C8 C9 H9A 108.5 . . ? 
C10 C9 H9B 108.5 . . ? 
C8 C9 H9B 108.5 . . ? 
H9A C9 H9B 107.5 . . ? 
O3 C10 C9 120.36(13) . . ? 
O3 C10 C5 121.05(13) . . ? 
C9 C10 C5 118.59(12) . . ? 
C4 C11 H11A 109.5 . . ? 
C4 C11 H11B 109.5 . . ? 
H11A C11 H11B 109.5 . . ? 
C4 C11 H11C 109.5 . . ? 
H11A C11 H11C 109.5 . . ? 
H11B C11 H11C 109.5 . . ? 
C5 C12 H12A 109.5 . . ? 
C5 C12 H12B 109.5 . . ? 
H12A C12 H12B 109.5 . . ? 
C5 C12 H12C 109.5 . . ? 
H12A C12 H12C 109.5 . . ? 
H12B C12 H12C 109.5 . . ? 
C14 C13 C6 123.47(16) . . ? 
C14 C13 H13A 118.3 . . ? 
C6 C13 H13A 118.3 . . ? 
C13 C14 H14A 120.0 . . ? 
C13 C14 H14B 120.0 . . ? 
H14A C14 H14B 120.0 . . ? 
C7 C15 H15A 109.5 . . ? 
C7 C15 H15B 109.5 . . ? 
H15A C15 H15B 109.5 . . ? 
C7 C15 H15C 109.5 . . ? 
H15A C15 H15C 109.5 . . ? 
H15B C15 H15C 109.5 . . ? 
  
loop_ 
 _geom_torsion_atom_site_label_1 
 _geom_torsion_atom_site_label_2 
 _geom_torsion_atom_site_label_3 
 _geom_torsion_atom_site_label_4 
 _geom_torsion 
 _geom_torsion_site_symmetry_1 
 _geom_torsion_site_symmetry_2 
 _geom_torsion_site_symmetry_3 
 _geom_torsion_site_symmetry_4 
 _geom_torsion_publ_flag 
O1 C1 C2 C3 174.35(15) . . . . ? 
C1 C2 C3 C7 -169.10(14) . . . . ? 
C1 C2 C3 C4 3.3(2) . . . . ? 
C2 C3 C4 O2 -60.60(19) . . . . ? 
C7 C3 C4 O2 112.62(13) . . . . ? 
C2 C3 C4 C11 58.66(19) . . . . ? 
C7 C3 C4 C11 -128.11(13) . . . . ? 
C2 C3 C4 C5 -177.71(14) . . . . ? 
C7 C3 C4 C5 -4.48(14) . . . . ? 
O2 C4 C5 C10 160.89(11) . . . . ? 
C11 C4 C5 C10 44.18(15) . . . . ? 
C3 C4 C5 C10 -82.08(13) . . . . ? 
O2 C4 C5 C12 36.04(16) . . . . ? 
C11 C4 C5 C12 -80.67(15) . . . . ? 
C3 C4 C5 C12 153.07(12) . . . . ? 
O2 C4 C5 C6 -86.21(13) . . . . ? 
C11 C4 C5 C6 157.08(12) . . . . ? 
C3 C4 C5 C6 30.82(13) . . . . ? 
C10 C5 C6 C13 -58.21(16) . . . . ? 
C12 C5 C6 C13 65.11(17) . . . . ? 
C4 C5 C6 C13 -173.11(12) . . . . ? 
C10 C5 C6 C7 68.65(13) . . . . ? 
C12 C5 C6 C7 -168.04(11) . . . . ? 
C4 C5 C6 C7 -46.25(13) . . . . ? 
C2 C3 C7 C15 29.2(2) . . . . ? 
C4 C3 C7 C15 -144.29(12) . . . . ? 
C2 C3 C7 C8 -94.60(16) . . . . ? 
C4 C3 C7 C8 91.86(14) . . . . ? 
C2 C3 C7 C6 149.97(14) . . . . ? 
C4 C3 C7 C6 -23.57(14) . . . . ? 
C13 C6 C7 C3 169.16(12) . . . . ? 
C5 C6 C7 C3 42.95(13) . . . . ? 
C13 C6 C7 C15 -68.76(16) . . . . ? 
C5 C6 C7 C15 165.03(11) . . . . ? 
C13 C6 C7 C8 53.43(16) . . . . ? 
C5 C6 C7 C8 -72.78(14) . . . . ? 
C3 C7 C8 C9 -55.83(16) . . . . ? 
C15 C7 C8 C9 177.80(12) . . . . ? 
C6 C7 C8 C9 54.16(16) . . . . ? 
C7 C8 C9 C10 -31.44(18) . . . . ? 
C8 C9 C10 O3 -148.69(14) . . . . ? 
C8 C9 C10 C5 31.33(18) . . . . ? 
C12 C5 C10 O3 4.11(19) . . . . ? 
C6 C5 C10 O3 128.99(14) . . . . ? 
C4 C5 C10 O3 -121.82(14) . . . . ? 
C12 C5 C10 C9 -175.91(13) . . . . ? 
C6 C5 C10 C9 -51.03(16) . . . . ? 
C4 C5 C10 C9 58.16(16) . . . . ? 
C5 C6 C13 C14 -124.46(18) . . . . ? 
C7 C6 C13 C14 115.98(19) . . . . ? 
  
loop_ 
 _geom_hbond_atom_site_label_D 
 _geom_hbond_atom_site_label_H 
 _geom_hbond_atom_site_label_A 
 _geom_hbond_distance_DH 
 _geom_hbond_distance_HA 
 _geom_hbond_distance_DA 
 _geom_hbond_angle_DHA 
 _geom_hbond_site_symmetry_A 
O2 H2 O3  0.853(9) 1.978(9) 2.8279(16) 174.3(16) 4_576 
  
_diffrn_measured_fraction_theta_max    0.996 
_diffrn_reflns_theta_full              25.00 
_diffrn_measured_fraction_theta_full   1.000 
_refine_diff_density_max    0.308 
_refine_diff_density_min   -0.213 
_refine_diff_density_rms    0.043 
